# Supplementary material
Source: PubMed Central journal article supplement (PMC2978617)
Supplement: supp_M110.159301_jbc.M110.159301-1.pdf [file supp_M110.159301_jbc.M110.159301-1.pdf]

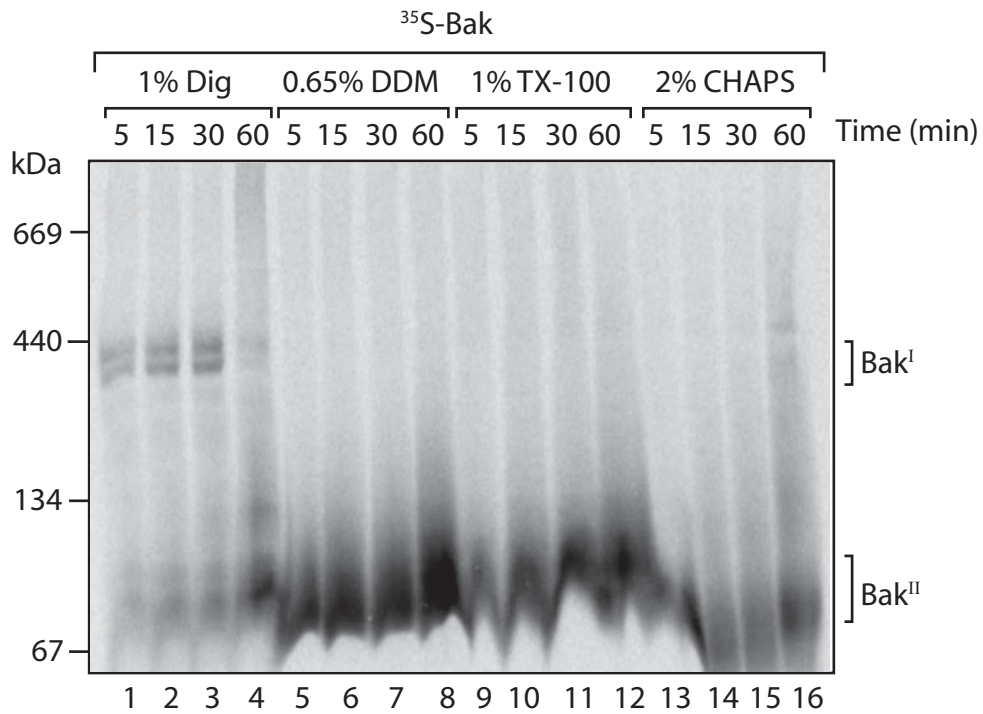

Figure S1: The 400 kDa Bak complex is detergent-labile. Mitochondria isolated from HeLa cells were incubated with <sup>35</sup>S-Bak precursor at 37 °C for the indicated times. Following import, mitochondria were re-isolated and lysed in solubilization buffer containing either digitonin (Dig), dodecyl maltoside (DDM), Triton X-100 (TX-100) or CHAPS, followed by BN-PAGE and digital autoradiography.
